# Supplementary material for: Frequency, risk factors, and impact on mortality of arterial thromboembolism in patients with cancer
Source: PubMed Central journal article supplement — Haematologica. 2018 May 24;103(9):1549–56. doi: 10.3324/haematol.2018.192419 (PMC6119137; doi:10.3324/haematol.2018.192419), 2018-09
Supplement: 2018_192419-Disclosures_and_Contributions.pdf [file 2018_192419-Disclosures_and_Contributions.pdf]

Haematologica  
HAEMATOL/2018/192419  
Version 3

Frequency, risk factors, and impact on mortality of arterial thromboembolism in patients with cancer.

Ella Grilz, Oliver Königsbrügge, Florian Posch, Manuela Schmidinger, Robert Pirker, Irene M. Lang, Ingrid Pabinger, and Cihan Ay

Disclosures: This study was supported by the Anniversary Fund of the Austrian National Bank ("Jubiläumsfonds der Österreichischen Nationalbank" project numbers #10935, #12739 and #14744).

Contributions: E.G. acquired, analyzed, and interpreted data, coordinated the study, and drafted the manuscript; O.K. acquired and interpreted data, and recruited patients; F.P. performed statistical analyses and critically revised the manuscript; M.S.. critically revised the manuscript for important intellectual content and contributed to the study design; R.P. critically revised the manuscript for important intellectual content and contributed to the study design; I.M.L. critically revised the manuscript for important intellectual content, was member of the adjudication committee, and contributed to the study design; I.P. designed and conceived the study, obtained funding, critically revised the manuscript for important intellectual content, and provided administrative support. C.A. acquired data, designed and supervised the study, obtained funding, critically revised the manuscript for important intellectual content, and provided administrative support; all authors reviewed and edited the manuscript and finally approved the article.
