# Supplementary material for: Frequency, risk factors, and impact on mortality of arterial thromboembolism in patients with cancer
Source: PubMed Central journal article supplement — Haematologica. 2018 May 24;103(9):1549–56. doi: 10.3324/haematol.2018.192419 (PMC6119137; doi:10.3324/haematol.2018.192419), 2018-09
Supplement: HAEMATOL-2018-192419v3-Grilz-01.pdf [file HAEMATOL-2018-192419v3-Grilz-01.pdf]

# Association of arterial thromboembolism and cancer

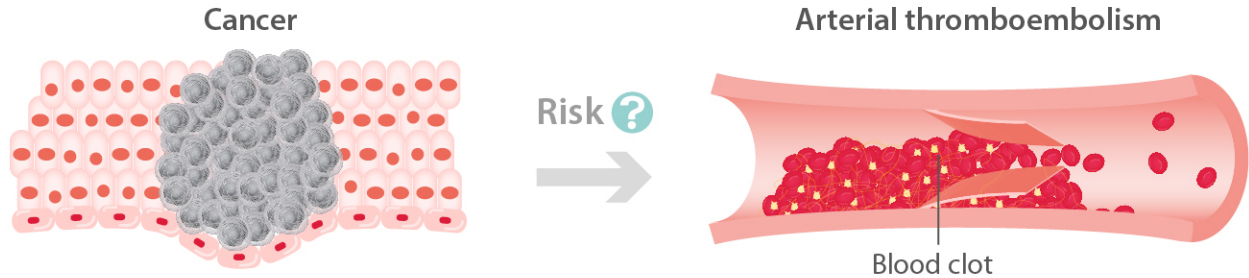

 **1880** Patients with newly-diagnosed cancer (73.7%) or progression of disease after remission (26.3%)

 **Median follow-up 723 days**

## Risk of arterial thromboembolism

- 2.6%** Arterial thromboembolism
- 8.4%** Venous thromboembolism
- 40.1%** Death

|       |                                  |       |                             |
|-------|----------------------------------|-------|-----------------------------|
| 39.6% | Non-fatal myocardial infarctions | 25.0% | Peripheral arterial events  |
| 33.3% | Ischemic strokes                 | 2.1%  | Fatal myocardial infarction |

## Risk factors for arterial thromboembolism

- Male sex** SHR: 2.9, 95%CI: 1.5-5.6, p=.002
- Age** SHR per 10 year increase: 1.5, 95%CI: 1.2-1.7, p<.001
- Hypertension** SHR: 3.1, 95%CI: 1.7-5.5, p<.001

- Smoking** SHR: 2.0, 95%CI: 1.1-3.7, p=.022
- Lung cancer** SHR: 2.3, 95%CI: 1.2-4.2, p=.009
- Kidney cancer** SHR: 3.8, 95%CI: 1.4-10.5, p=.012
